# Supplementary material for: Loss of SRSF2 triggers hepatic progenitor cell activation and tumor development in mice
Source: PubMed Central journal article supplement (PMC7200752; doi:10.1038/s42003-020-0893-5), 2020-05-05
Supplement: 42003_2020_893_MOESM7_ESM.pdf [file 42003_2020_893_MOESM7_ESM.pdf]

**Description for Supplementary Data as follows:**

**Supplementary Data 1:** source data for Fig. 1

**Supplementary Data 2:** lists of antibodies and primer sequences for Fig. 1-7

**Supplementary Data 3:** source data for Fig. 2, 3

**Supplementary Data 4:** source data for Fig. 6

**Supplementary Data 5:** source data for Fig. 7
